# Supplementary material for: A Simple Model for Elastic‐Plastic Contact of Granular Geomaterials
Source: Hindawi journal article supplement (doi:10.1155/2018/6783791), 2018-01-01
Supplement: f1 [file 6783791.f1.xls]

## Sheet: Coefficients
	X1	X2	X3				X4
	E	v	A				S							Y1	Y2	Y3	Y4
No	E(GPa)	ν	φ（degree）	Si(MPa) or C	T0(MPa)	β(°)-input data	σc(MPa)-input data	u(z/a)	f(v,u)Y	P0(Pa)	FY(N)	a(m)	δ(m)	a	b	m	n
1	10	0.1	20				5			7.95364e+06	0.254839	0.000123686	1.52983e-07	0.4542	1.392	1.187	1.35
2	10	0.1	20				10			1.59073e+07	2.03872	0.000247372	6.1193e-07	0.4068	1.424	0.627	1.418
3	10	0.1	20				20			3.18146e+07	16.3097	0.000494745	2.44772e-06	0.3664	1.471	0.4185	1.466
4	10	0.1	20				30			4.77218e+07	55.0453	0.000742117	5.50737e-06	0.3573	1.492	0.3673	1.483
5	10	0.1	20				40			6.36291e+07	130.478	0.000989489	9.79089e-06	0.3557	1.495	0.3564	1.494
6	10	0.1	20				50			7.95364e+07	254.839	0.00123686	1.52983e-05	0.3549	1.495	0.3554	1.494
7	10	0.1	30				5			8.3892e+06	0.299041	0.00013046	1.70197e-07	0.3995	1.447	0.685	1.42
8	10	0.1	30				10			1.67784e+07	2.39233	0.000260919	6.80788e-07	0.3806	1.461	0.4842	1.455
9	10	0.1	30				20			3.35568e+07	19.1386	0.000521838	2.72315e-06	0.3611	1.485	0.3828	1.485
10	10	0.1	30				30			5.03352e+07	64.5929	0.000782757	6.12709e-06	0.3567	1.494	0.3602	1.49
11	10	0.1	30				40			6.71136e+07	153.109	0.00104368	1.08926e-05	0.3554	1.495	0.356	1.494
12	10	0.1	30				50			8.3892e+07	299.041	0.0013046	1.70197e-05	0.3547	1.495	0.3552	1.494
13	10	0.1	40				5			8.59415e+06	0.321498	0.000133647	1.78614e-07	0.3839	1.47	0.5023	1.457
14	10	0.1	40				10			1.71883e+07	2.57198	0.000267293	7.14458e-07	0.3702	1.479	0.4227	1.473
15	10	0.1	40				20			3.43766e+07	20.5759	0.000534587	2.85783e-06	0.3592	1.491	0.37	1.49
16	10	0.1	40				30			5.15649e+07	69.4436	0.00080188	6.43012e-06	0.3565	1.495	0.358	1.493
17	10	0.1	40				40			6.87532e+07	164.607	0.00106917	1.14313e-05	0.3553	1.495	0.356	1.494
18	10	0.1	40				50			8.59415e+07	321.498	0.00133647	1.78614e-05	0.3545	1.495	0.355	1.494
19	10	0.2	20				5			9.01769e+06	0.349242	0.000135984	1.84915e-07	0.4485	1.398	1.107	1.352
20	10	0.2	20				10			1.80354e+07	2.79394	0.000271967	7.39661e-07	0.3934	1.437	0.5671	1.431
21	10	0.2	20				20			3.60708e+07	22.3515	0.000543934	2.95864e-06	0.3627	1.478	0.397	1.473
22	10	0.2	20				30			5.41061e+07	75.4363	0.000815901	6.65695e-06	0.3559	1.495	0.359	1.491
23	10	0.2	20				40			7.21415e+07	178.812	0.00108787	1.18346e-05	0.3547	1.495	0.3554	1.494
24	10	0.2	20				50			9.01769e+07	349.242	0.00135984	1.84915e-05	0.3541	1.495	0.3546	1.494
25	10	0.2	30				5			9.8986e+06	0.461915	0.000149267	2.22807e-07	0.392	1.454	0.616	1.43
26	10	0.2	30				10			1.97972e+07	3.69532	0.000298535	8.9123e-07	0.3725	1.47	0.4472	1.464
27	10	0.2	30				20			3.95944e+07	29.5626	0.000597069	3.56492e-06	0.3585	1.489	0.3713	1.486
28	10	0.2	30				30			5.93916e+07	99.7736	0.000895604	8.02107e-06	0.3556	1.495	0.3564	1.494
29	10	0.2	30				40			7.91888e+07	236.5	0.00119414	1.42597e-05	0.3546	1.495	0.3552	1.494
30	10	0.2	30				50			9.8986e+07	461.915	0.00149267	2.22807e-05	0.3539	1.495	0.3542	1.494
31	10	0.2	40				5			1.0691e+07	0.581965	0.000161217	2.59908e-07	0.377	1.476	0.4636	1.463
32	10	0.2	40				10			2.1382e+07	4.65572	0.000322433	1.03963e-06	0.364	1.486	0.3982	1.479
33	10	0.2	40				20			4.2764e+07	37.2457	0.000644866	4.15853e-06	0.3571	1.494	0.3622	1.491
34	10	0.2	40				30			6.4146e+07	125.704	0.0009673	9.35668e-06	0.3553	1.495	0.3561	1.494
35	10	0.2	40				40			8.55281e+07	297.966	0.00128973	1.66341e-05	0.3542	1.495	0.3547	1.494
36	10	0.2	40				50			1.0691e+08	581.965	0.00161217	2.59908e-05	0.3536	1.495	0.3539	1.494
37	10	0.3	20				5			1.02836e+07	0.465395	0.000146997	2.16081e-07	0.4323	1.407	1.01	1.361
38	10	0.3	20				10			2.05673e+07	3.72316	0.000293994	8.64323e-07	0.3858	1.444	0.5357	1.434
39	10	0.3	20				20			4.11346e+07	29.7853	0.000587988	3.45729e-06	0.3591	1.483	0.3808	1.479
40	10	0.3	20				30			6.17018e+07	100.525	0.000881981	7.77891e-06	0.3546	1.495	0.3555	1.493
41	10	0.3	20				40			8.22691e+07	238.282	0.00117598	1.38292e-05	0.3536	1.495	0.3541	1.493
42	10	0.3	20				50			1.02836e+08	465.395	0.00146997	2.16081e-05	0.3528	1.495	0.353	1.493
43	10	0.3	30				5			1.18111e+07	0.705096	0.00016883	2.85037e-07	0.3839	1.461	0.557	1.44
44	10	0.3	30				10			2.36221e+07	5.64077	0.000337661	1.14015e-06	0.367	1.476	0.4218	1.469
45	10	0.3	30				20			4.72443e+07	45.1262	0.000675321	4.56059e-06	0.3561	1.492	0.3625	1.489
46	10	0.3	30				30			7.08664e+07	152.301	0.00101298	1.02613e-05	0.354	1.495	0.3547	1.493
47	10	0.3	30				40			9.44885e+07	361.009	0.00135064	1.82423e-05	0.353	1.495	0.3533	1.493
48	10	0.3	30				50			1.18111e+08	705.096	0.0016883	2.85037e-05	0.3522	1.495	0.3522	1.493
49	10	0.3	40				5			1.35873e+07	1.07345	0.000194221	3.77216e-07	0.37	1.481	0.557	1.44
50	10	0.3	40				10			2.71747e+07	8.58762	0.000388441	1.50887e-06	0.3604	1.489	0.4218	1.469
51	10	0.3	40				20			5.43493e+07	68.701	0.000776882	6.03546e-06	0.3551	1.495	0.3625	1.489
52	10	0.3	40				30			8.1524e+07	231.866	0.00116532	1.35798e-05	0.3536	1.495	0.3547	1.493
53	10	0.3	40				40			1.08699e+08	549.608	0.00155376	2.41418e-05	0.3525	1.495	0.3527	1.493
54	10	0.3	40				50			1.35873e+08	1073.45	0.00194221	3.77216e-05	0.3517	1.495	0.3516	1.493
55	20	0.1	20				5			7.95364e+06	0.0637099	6.18431e-05	3.82457e-08	0.4893	1.375	2.083	1.296
56	20	0.1	20				10			1.59073e+07	0.509679	0.000123686	1.52983e-07	0.4376	1.403	0.9169	1.379
57	20	0.1	20				20			3.18146e+07	4.07743	0.000247372	6.1193e-07	0.3929	1.437	0.527	1.442
58	20	0.1	20				30			4.77218e+07	13.7613	0.000371058	1.37684e-06	0.3706	1.466	0.4298	1.465
59	20	0.1	20				40			6.36291e+07	32.6194	0.000494745	2.44772e-06	0.362	1.482	0.3881	1.474
60	20	0.1	20				50			7.95364e+07	63.7099	0.000618431	3.82457e-06	0.3584	1.491	0.3647	1.484
61	20	0.1	30				5			8.3892e+06	0.0747603	6.52298e-05	4.25492e-08	0.4171	1.438	0.9266	1.392
62	20	0.1	30				10			1.67784e+07	0.598082	0.00013046	1.70197e-07	0.3957	1.45	0.6005	1.434
63	20	0.1	30				20			3.35568e+07	4.78466	0.000260919	6.80788e-07	0.3748	1.468	0.4422	1.467
64	20	0.1	30				30			5.03352e+07	16.1482	0.000391379	1.53177e-06	0.364	1.482	0.3903	1.483
65	20	0.1	30				40			6.71136e+07	38.2773	0.000521838	2.72315e-06	0.3598	1.489	0.3692	1.486
66	20	0.1	30				50			8.3892e+07	74.7603	0.000652298	4.25492e-06	0.3578	1.492	0.3605	1.489
67	20	0.1	40				5			8.59415e+06	0.0803745	6.68233e-05	4.46536e-08	0.3941	1.466	0.5733	1.446
68	20	0.1	40				10			1.71883e+07	0.642996	0.000133647	1.78614e-07	0.3824	1.471	0.4845	1.457
69	20	0.1	40				20			3.43766e+07	5.14397	0.000267293	7.14458e-07	0.3681	1.482	0.4055	1.478
70	20	0.1	40				30			5.15649e+07	17.3609	0.00040094	1.60753e-06	0.3616	1.489	0.3761	1.487
71	20	0.1	40				40			6.87532e+07	41.1517	0.000534587	2.85783e-06	0.3592	1.491	0.3645	1.489
72	20	0.1	40				50			8.59415e+07	80.3745	0.000668233	4.46536e-06	0.3576	1.492	0.3595	1.489
73	20	0.2	20				5			9.01769e+06	0.0873105	6.79918e-05	4.62288e-08	0.4941	1.375	2.009	1.293
74	20	0.2	20				10			1.80354e+07	0.698484	0.000135984	1.84915e-07	0.4254	1.412	0.8299	1.389
75	20	0.2	20				20			3.60708e+07	5.58787	0.000271967	7.39661e-07	0.3822	1.45	0.492	1.448
76	20	0.2	20				30			5.41061e+07	18.8591	0.000407951	1.66424e-06	0.3651	1.474	0.408	1.471
77	20	0.2	20				40			7.21415e+07	44.703	0.000543934	2.95864e-06	0.3591	1.488	0.3726	1.482
78	20	0.2	20				50			9.01769e+07	87.3105	0.000679918	4.62288e-06	0.3569	1.493	0.3587	1.49
79	20	0.2	30				5			9.8986e+06	0.115479	7.46337e-05	5.57019e-08	0.4109	1.444	0.8259	1.402
80	20	0.2	30				10			1.97972e+07	0.92383	0.000149267	2.22807e-07	0.3864	1.459	0.5451	1.443
81	20	0.2	30				20			3.95944e+07	7.39064	0.000298535	8.9123e-07	0.3676	1.477	0.4154	1.474
82	20	0.2	30				30			5.93916e+07	24.9434	0.000447802	2.00527e-06	0.3604	1.487	0.3761	1.485
83	20	0.2	30				40			7.91888e+07	59.1251	0.000597069	3.56492e-06	0.3577	1.492	0.362	1.489
84	20	0.2	30				50			9.8986e+07	115.479	0.000746337	5.57019e-06	0.3564	1.493	0.3577	1.491
85	20	0.2	40				5			1.0691e+07	0.145491	8.06083e-05	6.4977e-08	0.3829	1.474	0.5196	1.454
86	20	0.2	40				10			2.1382e+07	1.16393	0.000161217	2.59908e-07	0.3736	1.479	0.4454	1.465
87	20	0.2	40				20			4.2764e+07	9.31144	0.000322433	1.03963e-06	0.3624	1.488	0.3867	1.482
88	20	0.2	40				30			6.4146e+07	31.4261	0.00048365	2.33917e-06	0.3589	1.491	0.3663	1.488
89	20	0.2	40				40			8.55281e+07	74.4915	0.000644866	4.15853e-06	0.3572	1.493	0.3594	1.49
90	20	0.2	40				50			1.0691e+08	145.491	0.000806083	6.4977e-06	0.3561	1.493	0.3572	1.491
91	20	0.3	20				5			1.02836e+07	0.116349	7.34984e-05	5.40202e-08	0.4904	1.377	1.868	1.298
92	20	0.3	20				10			2.05673e+07	0.93079	0.000146997	2.16081e-07	0.4143	1.42	0.7711	1.394
93	20	0.3	20				20			4.11346e+07	7.44632	0.000293994	8.64323e-07	0.375	1.458	0.4648	1.453
94	20	0.3	20				30			6.17018e+07	25.1313	0.000440991	1.94473e-06	0.3616	1.48	0.3913	1.476
95	20	0.3	20				40			8.22691e+07	59.5706	0.000587988	3.45729e-06	0.3567	1.491	0.3622	1.489
96	20	0.3	20				50			1.02836e+08	116.349	0.000734984	5.40202e-06	0.3554	1.491	0.3603	1.489
97	20	0.3	30				5			1.18111e+07	0.176274	8.44152e-05	7.12592e-08	0.4033	1.45	0.7403	1.412
98	20	0.3	30				10			2.36221e+07	1.41019	0.00016883	2.85037e-07	0.3783	1.466	0.5029	1.45
99	20	0.3	30				20			4.72443e+07	11.2815	0.000337661	1.14015e-06	0.3628	1.482	0.3976	1.477
100	20	0.3	30				30			7.08664e+07	38.0752	0.000506491	2.56533e-06	0.3577	1.49	0.3661	1.488
101	20	0.3	30				40			9.44885e+07	90.2523	0.000675321	4.56059e-06	0.3558	1.493	0.3579	1.49
102	20	0.3	30				50			1.18111e+08	176.274	0.000844152	7.12592e-06	0.3548	1.494	0.3558	1.491
103	20	0.3	40				5			1.35873e+07	0.268363	9.71103e-05	9.43041e-08	0.3749	1.48	0.4741	1.463
104	20	0.3	40				10			2.71747e+07	2.14691	0.000194221	3.77216e-07	0.3663	1.485	0.4161	1.472
105	20	0.3	40				20			5.43493e+07	17.1752	0.000388441	1.50887e-06	0.3594	1.49	0.3748	1.483
106	20	0.3	40				30			8.1524e+07	57.9665	0.000582662	3.39495e-06	0.3565	1.493	0.3598	1.49
107	20	0.3	40				40			1.08699e+08	137.402	0.000776882	6.03546e-06	0.3551	1.494	0.3563	1.491
108	20	0.3	40				50			1.35873e+08	268.363	0.000971103	9.43041e-06	0.3541	1.494	0.3549	1.491
109	30	0.1	20				5			7.95364e+06	0.0283155	4.12287e-05	1.69981e-08	0.5295	1.36	2.891	1.274
110	30	0.1	20				10			1.59073e+07	0.226524	8.24574e-05	6.79923e-08	0.4605	1.39	1.202	1.352
111	30	0.1	20				20			3.18146e+07	1.81219	0.000164915	2.71969e-07	0.4099	1.422	0.6247	1.425
112	30	0.1	20				30			4.77218e+07	6.11615	0.000247372	6.1193e-07	0.3865	1.445	0.4854	1.454
113	30	0.1	20				40			6.36291e+07	14.4975	0.00032983	1.08788e-06	0.3713	1.466	0.4264	1.467
114	30	0.1	20				50			7.95364e+07	28.3155	0.000412287	1.69981e-06	0.3645	1.478	0.3953	1.472
115	30	0.1	30				5			8.3892e+06	0.0332268	4.34865e-05	1.89108e-08	0.4292	1.433	1.151	1.372
116	30	0.1	30				10			1.67784e+07	0.265814	8.6973e-05	7.56431e-08	0.4049	1.445	0.6949	1.421
117	30	0.1	30				20			3.35568e+07	2.12651	0.000173946	3.02572e-07	0.3868	1.458	0.4954	1.453
118	30	0.1	30				30			5.03352e+07	7.17699	0.000260919	6.80788e-07	0.3724	1.472	0.4243	1.473
119	30	0.1	30				40			6.71136e+07	17.0121	0.000347892	1.21029e-06	0.3648	1.482	0.3911	1.483
120	30	0.1	30				50			8.3892e+07	33.2268	0.000434865	1.89108e-06	0.3617	1.486	0.3744	1.485
121	30	0.1	40				5			8.59415e+06	0.035722	4.45489e-05	1.9846e-08	0.3984	1.465	0.5854	1.45
122	30	0.1	40				10			1.71883e+07	0.285776	8.90978e-05	7.93842e-08	0.3875	1.469	0.5164	1.453
123	30	0.1	40				20			3.43766e+07	2.28621	0.000178196	3.17537e-07	0.3753	1.476	0.4356	1.468
124	30	0.1	40				30			5.15649e+07	7.71595	0.000267293	7.14458e-07	0.3673	1.484	0.3971	1.48
125	30	0.1	40				40			6.87532e+07	18.2897	0.000356391	1.27015e-06	0.3628	1.488	0.3776	1.486
126	30	0.1	40				50			8.59415e+07	35.722	0.000445489	1.9846e-06	0.3609	1.489	0.3673	1.488
127	30	0.2	20				5			9.01769e+06	0.0388047	4.53278e-05	2.05461e-08	0.5296	1.361	2.742	1.276
128	30	0.2	20				10			1.80354e+07	0.310437	9.06557e-05	8.21845e-08	0.4435	1.401	1.106	1.358
129	30	0.2	20				20			3.60708e+07	2.4835	0.000181311	3.28738e-07	0.3992	1.433	0.5749	1.433
130	30	0.2	20				30			5.41061e+07	8.38181	0.000271967	7.39661e-07	0.3766	1.458	0.4584	1.458
131	30	0.2	20				40			7.21415e+07	19.868	0.000362623	1.31495e-06	0.3658	1.474	0.4076	1.471
132	30	0.2	20				50			9.01769e+07	38.8047	0.000453278	2.05461e-06	0.361	1.484	0.3809	1.477
133	30	0.2	30				5			9.8986e+06	0.0513239	4.97558e-05	2.47564e-08	0.428	1.436	1.023	1.382
134	30	0.2	30				10			1.97972e+07	0.410591	9.95116e-05	9.90255e-08	0.3944	1.454	0.6231	1.431
135	30	0.2	30				20			3.95944e+07	3.28473	0.000199023	3.96102e-07	0.3767	1.468	0.4588	1.461
136	30	0.2	30				30			5.93916e+07	11.086	0.000298535	8.9123e-07	0.3656	1.481	0.4015	1.479
137	30	0.2	30				40			7.91888e+07	26.2778	0.000398046	1.58441e-06	0.3612	1.487	0.377	1.485
138	30	0.2	30				50			9.8986e+07	51.3239	0.000497558	2.47564e-06	0.3591	1.49	0.3643	1.488
139	30	0.2	40				5			1.0691e+07	0.0646627	5.37389e-05	2.88787e-08	0.3871	1.473	0.535	1.456
140	30	0.2	40				10			2.1382e+07	0.517302	0.000107478	1.15515e-07	0.3781	1.477	0.4768	1.459
141	30	0.2	40				20			4.2764e+07	4.13842	0.000214955	4.62058e-07	0.3675	1.484	0.409	1.474
142	30	0.2	40				30			6.4146e+07	13.9672	0.000322433	1.03963e-06	0.3623	1.489	0.3815	1.483
143	30	0.2	40				40			8.55281e+07	33.1073	0.000429911	1.84823e-06	0.3599	1.49	0.3679	1.486
144	30	0.2	40				50			1.0691e+08	64.6627	0.000537389	2.88787e-06	0.3584	1.492	0.3617	1.488
145	30	0.3	20				5			1.02836e+07	0.0517106	4.8999e-05	2.4009e-08	0.5326	1.359	2.531	1.282
146	30	0.3	20				10			2.05673e+07	0.413684	9.79979e-05	9.60359e-08	0.4371	1.405	1.031	1.361
147	30	0.3	20				20			4.11346e+07	3.30948	0.000195996	3.84144e-07	0.3898	1.442	0.5394	1.438
148	30	0.3	20				30			6.17018e+07	11.1695	0.000293994	8.64323e-07	0.3697	1.466	0.436	1.463
149	30	0.3	20				40			8.22691e+07	26.4758	0.000391992	1.53657e-06	0.3621	1.48	0.3923	1.475
150	30	0.3	20				50			1.02836e+08	51.7106	0.00048999	2.4009e-06	0.3582	1.489	0.3678	1.485
151	30	0.3	30				5			1.18111e+07	0.078344	5.62768e-05	3.16707e-08	0.4254	1.44	0.8918	1.397
152	30	0.3	30				10			2.36221e+07	0.626752	0.000112554	1.26683e-07	0.3843	1.462	0.5665	1.44
153	30	0.3	30				20			4.72443e+07	5.01402	0.000225107	5.06732e-07	0.3689	1.476	0.4308	1.467
154	30	0.3	30				30			7.08664e+07	16.9223	0.000337661	1.14015e-06	0.3615	1.485	0.3871	1.48
155	30	0.3	30				40			9.44885e+07	40.1122	0.000450214	2.02693e-06	0.3586	1.49	0.367	1.487
156	30	0.3	30				50			1.18111e+08	78.344	0.000562768	3.16707e-06	0.3569	1.492	0.3598	1.489
157	30	0.3	40				5			1.35873e+07	0.119273	6.47402e-05	4.19129e-08	0.3789	1.479	0.5007	1.46
158	30	0.3	40				10			2.71747e+07	0.95418	0.00012948	1.67652e-07	0.3712	1.482	0.4409	1.466
159	30	0.3	40				20			5.43493e+07	7.63344	0.000258961	6.70607e-07	0.3624	1.488	0.3919	1.477
160	30	0.3	40				30			8.1524e+07	25.7629	0.000388441	1.50887e-06	0.3593	1.491	0.3713	1.483
161	30	0.3	40				40			1.08699e+08	61.0676	0.000517922	2.68243e-06	0.3572	1.492	0.3612	1.489
162	30	0.3	40				50			1.35873e+08	119.273	0.000647402	4.19129e-06	0.356	1.492	0.3579	1.489
